# Supplementary material for: Effects of Sex Class, a Combined Androgen and Estrogen Implant, and Pasture Supplementation on Growth and Carcass Performance and Meat Quality of Zebu-Type Grass-Fed Cattle
Source: MDPI journal article supplement (doi:10.3390/ani11123441), 2021-12-02
Supplement: s1 [file s1]

### Supplementary materials

**Table S1.** Probabilities values for interactions between sex class, implant<sup>a</sup>, and supplementation<sup>b</sup> on growth performance of grass-fed Brahman males.

| Variables                              | Sex class x<br>Implant | Sex class x<br>Supplementation | Supplementation x<br>Implant | Three-way<br>interaction |
|----------------------------------------|------------------------|--------------------------------|------------------------------|--------------------------|
| Hip height, cm                         | 0.92                   | 0.51                           | 0.54                         | 0.50                     |
| Muscle score <sup>c</sup>              | 0.37                   | 0.30                           | 0.38                         | 0.80                     |
| Frame size score <sup>d</sup>          | 0.25                   | 0.26                           | 0.95                         | 0.95                     |
| Chronological age                      | 0.06                   | 0.53                           | 0.61                         | 0.08                     |
| BW at the end of SUPPL period          | 0.21                   | 0.84                           | 0.58                         | 0.82                     |
| BW (endpoint) at shipping <sup>e</sup> | 0.71                   | 0.68                           | 0.59                         | 0.07                     |
| Time to reaching endpoint              | 0.14                   | 0.96                           | 0.83                         | 0.25                     |
| ADG1 (d 0 – d 163)                     | 0.01                   | 0.92                           | 0.09                         | 0.18                     |
| ADG2 (d 0 – d of shipping)             | 0.01                   | 0.95                           | 0.19                         | 0.31                     |
| Adjusted BW <sup>f</sup>               | 0.71                   | 0.68                           | 0.59                         | 0.33                     |
| Adjusted ADG2 <sup>g</sup>             | 0.13                   | 0.94                           | 0.17                         | 0.96                     |

<sup>a</sup> A hormonal implant containing 24 mg estradiol benzoate 17 β (EB) and 120 mg of trenbolone acetate (TBA).<sup>b</sup> Supplemented group received pasture supplementation with a poultry litter-based supplement. <sup>c</sup> 1=very heavy muscled, and 5=lightly muscled [19]. <sup>d</sup> 1=very large, and 5=very small [19]. <sup>e</sup> Shipping day was the date of loading cattle from the ranch to the abattoir after reaching the endpoint. <sup>f</sup> Carcass-adjusted final BW was calculated from HCW divided by the average dressing percent across treatments and adjusted by a 4% shrink. <sup>g</sup> Carcass-adjusted ADG2 was calculated from carcass-adjusted final BW, initial BW, and days on feed.

**Table S2.** Probabilities values for interactions between sex class, implant<sup>a</sup>, and supplementation<sup>b</sup> on carcass characteristics of grass-fed Brahman males.

| Variables                       | Sex class x<br>Implant | Sex class x<br>Supplementation | Supplementation x<br>Implant | Three-way interaction |
|---------------------------------|------------------------|--------------------------------|------------------------------|-----------------------|
| Hot carcass weight              | 0.93                   | 0.51                           | 0.39                         | 0.23                  |
| Hot carcass dressing            | 0.63                   | 0.12                           | 0.68                         | 0.38                  |
| Cold carcass weight             | 0.77                   | 0.23                           | 0.23                         | 0.26                  |
| Cold carcass dressing           | 0.89                   | 0.02                           | 0.35                         | 0.37                  |
| Conformation score <sup>c</sup> | 0.35                   | 0.37                           | 0.74                         | 0.36                  |
| Finish score <sup>d</sup>       | 0.44                   | 0.61                           | 0.73                         | 0.94                  |
| KPH                             | 0.28                   | 0.04                           | 0.64                         | 0.48                  |
| Skeletal maturity <sup>e</sup>  | 0.48                   | 0.49                           | 0.60                         | 0.98                  |
| Lean maturity <sup>e</sup>      | 0.49                   | 0.38                           | 0.59                         | 0.52                  |
| Overall maturity <sup>e</sup>   | 0.83                   | 0.61                           | 0.60                         | 0.29                  |
| Adipose maturity <sup>f</sup>   | 0.48                   | 0.49                           | 0.90                         | 0.65                  |
| Ribeye area                     | 0.81                   | 0.77                           | 0.55                         | 0.29                  |
| 12 <sup>th</sup> -fat thickness | 0.28                   | 0.58                           | 0.79                         | 0.41                  |
| Marbling score <sup>g</sup>     | 0.39                   | 0.16                           | 0.39                         | 0.77                  |
| Thigh width                     | 0.54                   | 0.23                           | 0.85                         | 0.42                  |
| Pelvic limb length              | 0.76                   | 0.67                           | 0.14                         | 0.12                  |
| Carcass length                  | 0.62                   | 0.42                           | 0.23                         | 0.88                  |
| Leg perimeter                   | 0.06                   | 0.38                           | 0.12                         | 0.25                  |
| Thoracic depth                  | 0.11                   | 0.95                           | 0.16                         | 0.79                  |

<sup>a</sup>A hormonal implant containing 24 mg estradiol benzoate 17  $\beta$  (EB) and 120 mg of trenbolone acetate (TBA). <sup>b</sup>Supplemented group received pasture supplementation with a poultry litter-based supplement. <sup>c</sup>Conformation scores: 1 = Very convex, 2 = Convex, 3 = Rectilinear, 4 = Concave, 5 = Very concave [25]. <sup>d</sup>Finish score: 1 = Extremely abundant, 2 = Abundant, 3 = Medium, 4 = Slight, 5 = Scarce [26]. <sup>e</sup>Skeletal, lean, and overall maturity: 100–199: represent immature animals (100 is equal to A00 and 199 is equal to A99); 200–299: represent more mature animals (200 is equal to B00 and 299 is equal to B99) [27]. KPH: Kidney, pelvic and heart fat in percentage. <sup>f</sup>Adipose maturity: 1 = Ivory White, 2=creamy White, 3= light yellow, 4= intense yellow, 5= orange; <sup>g</sup>Marbling scores: 1= abundant; to moderate, 2= small, 3= slight, 4: traces, 5= practically devoid [26].

**Table S3.** Probabilities values for interactions between sex class, implant<sup>a</sup>, and supplementation<sup>b</sup> on individual and combined yield (%) of subprimal cuts<sup>c</sup> of grass-fed Brahman males

| Variables                               | Sex class x<br>Implant | Sex class x<br>Supplementation | Supplementation x<br>Implant | Three-way<br>interaction |
|-----------------------------------------|------------------------|--------------------------------|------------------------------|--------------------------|
| Tenderloin                              | 0.13                   | 0.45                           | 0.19                         | 0.58                     |
| Rib-eye roll and Striploin              | 0.24                   | 0.37                           | 0.54                         | 0.30                     |
| Knuckle                                 | 0.23                   | 0.27                           | 0.97                         | 0.64                     |
| Center cut Sirloin                      | 0.75                   | 0.20                           | 0.08                         | 0.77                     |
| Bottom (outside) round                  | 0.58                   | 0.06                           | 0.33                         | 0.32                     |
| Eye of round                            | 0.59                   | 0.40                           | 0.41                         | 0.88                     |
| Top sirloin cap or rump                 | 0.48                   | 0.36                           | 0.19                         | 0.35                     |
| Top (inside) round                      | 0.25                   | 0.94                           | 0.70                         | 0.86                     |
| Shoulder clod with top blade            | 0.82                   | 0.56                           | 0.91                         | 0.56                     |
| Chuck (mock) tender                     | 0.82                   | 0.21                           | 0.93                         | 0.55                     |
| Tri-tip                                 | 0.12                   | 0.81                           | 0.92                         | 0.70                     |
| Chuck roll                              | 0.96                   | 0.38                           | 0.53                         | 0.62                     |
| Heel of round                           | 0.07                   | 0.62                           | 0.11                         | 0.34                     |
| Inside skirt, flank, rose meat          | 0.88                   | 0.41                           | 0.63                         | 0.86                     |
| Rib plate                               | 0.12                   | 0.06                           | 0.47                         | 0.24                     |
| Bone-in Brisket                         | 0.04                   | 0.81                           | 0.16                         | 0.36                     |
| Bone -in Fore shank                     | 0.85                   | 0.75                           | 0.24                         | 0.56                     |
| Bone-in Hind shank                      | 0.04                   | 0.99                           | 0.24                         | 0.67                     |
| High-value boneless cuts <sup>d</sup>   | 0.89                   | 0.65                           | 0.36                         | 0.26                     |
| Medium-value boneless cuts <sup>e</sup> | 0.79                   | 0.88                           | 0.91                         | 0.52                     |
| Low-value cuts <sup>f</sup>             | 0.44                   | 0.54                           | 0.99                         | 0.88                     |
| Total cuts <sup>g</sup>                 | 0.85                   | 0.65                           | 0.48                         | 0.16                     |
| Trimable fat                            | 0.91                   | 0.09                           | 0.11                         | 0.21                     |
| Clean bone                              | 0.55                   | 0.07                           | 0.93                         | 0.65                     |

<sup>a</sup>A hormonal implant containing 24 mg estradiol benzoate 17  $\beta$  (EB) and 120 mg of trenbolone acetate (TBA).

<sup>b</sup>Supplemented group received pasture supplementation with a poultry litter-based supplement. <sup>c</sup>Equivalence of names for individual cuts in different countries were reported by Montero *et al.* [28] and yield values are expressed as percentages of the cold carcass weight. <sup>d</sup>High-value boneless cuts: tenderloin + rib-eye roll and strip-loin + center cut sirloin or top sirloin butt +eye of round + top (inside) round +bottom (outside) round + knuckle + tri-tip + heel of

round. <sup>e</sup> Medium-value boneless cuts: shoulder clod and flat iron + chuck (mock) tender + chuck roll. <sup>f</sup> Low-value cuts: brisket + inside skirt, flank, flank steak, rose meat and shoulder rose + rib plate + fore shank + hind shank. <sup>g</sup>

Total cuts: consists of the sum of the high-, medium-, and low-valued cuts.

**Table S4.** Probabilities values for interactions between sex class, implant<sup>a</sup>, and supplementation<sup>b</sup> on meat quality traits of grass-fed Brahman males

| Variables                                   | Sex class x<br>Implant | Sex class x<br>Supplementation | Supplementation x<br>Implant | Three-way<br>interaction |
|---------------------------------------------|------------------------|--------------------------------|------------------------------|--------------------------|
| Juiciness <sup>c</sup>                      | 0.82                   | 0.36                           | 0.85                         | 0.70                     |
| Amount of connective tissue<br><sup>d</sup> | 0.15                   | 0.29                           | 0.41                         | 0.28                     |
| Muscle-fiber tenderness <sup>e</sup>        | 0.11                   | 0.69                           | 0.19                         | 0.39                     |
| Overall tenderness <sup>e</sup>             | 0.10                   | 0.59                           | 0.32                         | 0.24                     |
| Flavor intensity <sup>f</sup>               | 0.57                   | 0.69                           | 0.96                         | 0.90                     |
| WBSF <sup>g</sup>                           | 0.86                   | 0.78                           | 0.66                         | 0.09                     |
| Cooking loss                                | 0.15                   | 0.17                           | 0.15                         | 0.21                     |
| Cooking time.                               | 0.95                   | 0.12                           | 0.58                         | 0.31                     |

<sup>a</sup>A hormonal implant containing 24 mg estradiol benzoate 17  $\beta$  (EB) and 120 mg of trenbolone acetate (TBA). <sup>b</sup>

Supplemented group received pasture supplementation with a poultry litter-based supplement. <sup>c</sup> 8-point hedonic scale, where 1 = extremely dry, and 8= extremely juicy. <sup>d</sup> 8-point hedonic scale, where 1= abundant amount of connective tissue, and 8= no connective tissue. <sup>e</sup> 8-point hedonic scale, where 1= extremely tough, and 8= extremely tender. <sup>f</sup> 8-point hedonic scale, where 1= extremely bland, and 8= extremely intense. <sup>g</sup> Warner-Bratzler shear force.
